# Supplementary material for: EHD1 confers resistance to cisplatin in non-small cell lung cancer by regulating intracellular cisplatin concentrations
Source: Springer Nature journal article supplement (doi:10.1186/s12885-016-2527-3), 2016-07-13
Supplement: MOESM2 [file 10493504]

**Supplementary Table 1.** Intra-day precision

| CDDP added ( $\mu\text{m/L}$ ) | Platinum concentration ( $\mu\text{m/L}$ ) | Recovery | Average recovery | RSD   |
|--------------------------------|--------------------------------------------|----------|------------------|-------|
| 2                              | 1.95                                       | 97.50%   | 99.00%           | 0.026 |
|                                | 1.99                                       | 99.50%   |                  |       |
|                                | 2                                          | 100.00%  |                  |       |
| 6                              | 6.08                                       | 101.33%  | 101.11%          | 0.023 |
|                                | 6.08                                       | 101.33%  |                  |       |
|                                | 6.04                                       | 100.67%  |                  |       |
| 10                             | 9.5                                        | 95.00%   | 95.37%           | 0.042 |
|                                | 9.52                                       | 95.20%   |                  |       |
|                                | 9.59                                       | 95.90%   |                  |       |

**Supplementary Table 2.** Inter-day precision

| CDDP added ( $\mu\text{m/L}$ ) | Platinum concentration ( $\mu\text{m/L}$ ) | Recovery | Average recovery | RSD   |
|--------------------------------|--------------------------------------------|----------|------------------|-------|
| 2                              | 1.96                                       | 98.00%   | 99.05%           | 0.020 |
|                                | 1.98                                       | 99.00%   |                  |       |
|                                | 2                                          | 100.00%  |                  |       |
| 6                              | 5.95                                       | 99.17%   | 99.56%           | 0.049 |
|                                | 5.94                                       | 99.00%   |                  |       |
|                                | 6.03                                       | 100.50%  |                  |       |
| 10                             | 9.76                                       | 97.60%   | 98.61%           | 0.044 |
|                                | 9.75                                       | 97.50%   |                  |       |
|                                | 9.68                                       | 96.80%   |                  |       |
